# Supplementary material for: Long-term Efficacy and Safety of Up to 108 Weeks of Ixekizumab in Pediatric Patients With Moderate to Severe Plaque Psoriasis: The IXORA-PEDS Randomized Clinical Trial
Source: PubMed Central journal article supplement — JAMA Dermatol. 2022 Apr 13;158(5):533–41. doi: 10.1001/jamadermatol.2022.0655 (PMC9008559; doi:10.1001/jamadermatol.2022.0655), 2022-04-13
Supplement: jamadermatol-e220655-s003.pdf [file jamadermatol-e220655-s003.pdf]

\*Indicates required information. Only first name, last name, and suffix will appear in PubMed.

| <b>*Group Name(s): IXORA-PEDS Investigators</b> |                   |                              |                  |                                                                        |                                          |                                                         |                                                                                            |
|-------------------------------------------------|-------------------|------------------------------|------------------|------------------------------------------------------------------------|------------------------------------------|---------------------------------------------------------|--------------------------------------------------------------------------------------------|
| <b>*First Name and Middle Initial(s)</b>        | <b>*Last Name</b> | <b>*Suffix (eg, Jr, III)</b> | Academic Degrees | Institution                                                            | Location (city, state/province, country) | Role or Contribution, eg, chair, principal investigator | Group (if more than 1 Group listed in the byline) and/or Subgroup (eg, Steering Committee) |
| Gabriel A.                                      | Magariños         |                              |                  | Psoriahue Medicina Interdisciplinaria                                  | Buenos Aires, Argentina                  |                                                         |                                                                                            |
| Ricardo                                         | Galimberti        |                              |                  | Centro de Investigaciones Metabólicas                                  | Buenos Aires, Argentina                  |                                                         |                                                                                            |
| Diego                                           | Viola             |                              |                  | Instituto Médico de la Fundación Estudios Clínicos                     | Santa Fe, Argentina                      |                                                         |                                                                                            |
| Paula                                           | Luna              |                              |                  | Instituto de Neumonología y Dermatología                               | Buenos Aires, Argentina                  |                                                         |                                                                                            |
| Charles                                         | Lynde             |                              |                  | Lynderm Research Inc                                                   | Markham, Ontario, Canada                 |                                                         |                                                                                            |
| Danielle                                        | Marcoux           |                              |                  | Hospital Ste Justine                                                   | Montreal, Quebec, Canada                 |                                                         |                                                                                            |
| Vimal                                           | Prajapati         |                              |                  | Dermatology Research Institute Inc. and Institute for Skin Advancement | Calgary, Alberta, Canada                 |                                                         |                                                                                            |
| Ajith                                           | Cy                |                              |                  | K. Papp Clinical Research Inc                                          | Waterloo, Ontario, Canada                |                                                         |                                                                                            |
| Petr                                            | Arenberger        |                              |                  | Fakultni nemocnice Kralovske Vinohrady                                 | Praha, Czech Republic                    |                                                         |                                                                                            |
| Stanislava                                      | Polaskova         |                              |                  | LF UK - Fakultni poliklinika                                           | Praha, Czech Republic                    |                                                         |                                                                                            |
| Hans                                            | Buckova           |                              |                  | Detska fakultni nemocnice                                              | Brno, Czech Republic                     |                                                         |                                                                                            |
| Jirina                                          | Bartonova         |                              |                  | Fakultni nemocnice Hradec Kralove                                      | Hradec Kralove, Czech Republic           |                                                         |                                                                                            |
| Petra                                           | Cetkovska         |                              |                  | Fakultni Nemocnice Plzen                                               | Plzen-Bory, Czech Republic               |                                                         |                                                                                            |
| Jana                                            | Hercogova         |                              |                  | Nemocnice Na Bulovce                                                   | Praha, Czech Republic                    |                                                         |                                                                                            |
| Jean-Philippe                                   | Lacour            |                              |                  | CHU de Nice Hopital de L'Archet                                        | Nice, France                             |                                                         |                                                                                            |
| Alice                                           | Phan              |                              |                  | Hôpital Femme Mère Enfant                                              | Bron, France                             |                                                         |                                                                                            |
| Michael                                         | Sticherling       |                              |                  | Universitätsklinikum Erlangen                                          | Erlangen, Germany                        |                                                         |                                                                                            |

## Supplemental Online Content: Nonauthor Collaborators

\*Indicates required information. Only first name, last name, and suffix will appear in PubMed.

| *First Name and Middle Initial(s) | *Last Name         | *Suffix (eg, Jr, III) | Academic Degrees | Institution                                                  | Location (city, state/province, country) | Role or Contribution, eg, chair, principal investigator | Group (if more than 1 Group listed in the byline) and/or Subgroup (eg, Steering Committee) |
|-----------------------------------|--------------------|-----------------------|------------------|--------------------------------------------------------------|------------------------------------------|---------------------------------------------------------|--------------------------------------------------------------------------------------------|
| Petra                             | Staubach-Renz      |                       |                  | Universitätsmedizin der Johannes Gutenberg-Universität Mainz | Mainz, Germany                           |                                                         |                                                                                            |
| Margrit                           | Simon              |                       |                  | ISA GmbH                                                     | Berlin, Germany                          |                                                         |                                                                                            |
| Andreas                           | Pinter             |                       |                  | Klinikum der Johann Wolfgang Goethe-Universität Frankfurt    | Frankfurt am Main, Germany               |                                                         |                                                                                            |
| Nina                              | Magnolo            |                       |                  | Universitätsklinikum Münster                                 | Münster, Germany                         |                                                         |                                                                                            |
| Piroska                           | Dosa               |                       |                  | Oroshaza Varosi Onkormanyzat Korhaza                         | Bejes, Hungary                           |                                                         |                                                                                            |
| Judit                             | Noll               |                       |                  | Szent Janos Korhaz es Eszak-budai Egyesitett Korhazak        | Budapest, Hungary                        |                                                         |                                                                                            |
| Eva                               | Remenyik           |                       |                  | Debreceni Egyetem Klinikai Kozpont Borgyogyaszati Klinika    | Debrecen, Hungary                        |                                                         |                                                                                            |
| Lajos                             | Kemeny             |                       |                  | SZTE AOK Borgyogyaszati es Allergologiai Klinika             | Szeged, Hungary                          |                                                         |                                                                                            |
| Noemi                             | Bakos              |                       |                  | Allergo-Derm Bakos Kft                                       | Szolnok, Hungary                         |                                                         |                                                                                            |
| Claudia                           | Bernabe del Rio    |                       |                  | Arke Estudios Clinicos S.A. de C.V.                          | Veracruz, Mexico                         |                                                         |                                                                                            |
| Mirna                             | Toledo-Bahena      |                       |                  | Hospital Infantil de México Federico Gómez                   | Ciudad de Mexico, Mexico                 |                                                         |                                                                                            |
| Minerva                           | Gomez Flores       |                       |                  | Hospital Universitario Dr. Jose Eleuterio Gonzalez           | Monterrey, Mexico                        |                                                         |                                                                                            |
| Zamira                            | Barragan Estudillo |                       |                  | RM Pharma Specialists S.A. de C.V.                           | Ciudad de Mexico, Mexico                 |                                                         |                                                                                            |
| Marieke                           | Seyger             |                       |                  | Universitair Medisch Centrum St Radboud Nijmegen             | Nijmegen, Netherlands                    |                                                         |                                                                                            |
| Jolanta                           | Weglowska          |                       |                  | DermMEDICA Sp. z o.o                                         | Wroclaw, Poland                          |                                                         |                                                                                            |
| Elzbieta                          | Szymanska          |                       |                  | Centralny Szpital Kliniczny MSWiA Klinika Dermatologii       | Warszawa, Poland                         |                                                         |                                                                                            |
| Andrzej                           | Kaszuba            |                       |                  | "Dermed" Centrum Medyczne Sp. z o.o.                         | Lodz, Poland                             |                                                         |                                                                                            |

## Supplemental Online Content: Nonauthor Collaborators

\*Indicates required information. Only first name, last name, and suffix will appear in PubMed.

| *First Name and Middle Initial(s) | *Last Name      | *Suffix (eg, Jr, III) | Academic Degrees | Institution                                      | Location (city, state/province, country) | Role or Contribution, eg, chair, principal investigator | Group (if more than 1 Group listed in the byline) and/or Subgroup (eg, Steering Committee) |
|-----------------------------------|-----------------|-----------------------|------------------|--------------------------------------------------|------------------------------------------|---------------------------------------------------------|--------------------------------------------------------------------------------------------|
| Nikolay                           | Murashkin       |                       |                  | Center of Children's Health                      | Moscow, Russia                           |                                                         |                                                                                            |
| Asuncion                          | Vicente Villa   |                       |                  | Hospital Sant Joan de Déu                        | Barcelona, Spain                         |                                                         |                                                                                            |
| Raul L.                           | Laguna          |                       |                  | Hospital Universitario La Paz                    | Madrid, Spain                            |                                                         |                                                                                            |
| Raquel                            | Rivera Diaz     |                       |                  | Hospital Universitario 12 de Octubre             | Madrid, Spain                            |                                                         |                                                                                            |
| Jerry                             | Bagel           |                       |                  | Psoriasis Treatment Center of Central New Jersey | East Windsor, New Jersey, United States  |                                                         |                                                                                            |
| John                              | Browning        |                       |                  | Texas Dermatology and Laser Specialists          | San Antonio, Texas, United States        |                                                         |                                                                                            |
| Michael                           | Bukhalo         |                       |                  | Arlington Dermatology                            | Rolling Meadows, Illinois, United States |                                                         |                                                                                            |
| Jennifer                          | Cather          |                       |                  | Modern Research Associates PLLC                  | Dallas, Texas, United States             |                                                         |                                                                                            |
| Alma                              | Cruz Santana    |                       |                  | Grupo Dermatologico de Carolina                  | Carolina, Puerto Rico, United States     |                                                         |                                                                                            |
| Boni                              | Elewski         |                       |                  | University of Alabama at Birmingham              | Birmingham, Alabama, United States       |                                                         |                                                                                            |
| Seth                              | Forman          |                       |                  | ForCare Clinical Research                        | Tampa, Florida, United States            |                                                         |                                                                                            |
| Jose                              | Gonzalez-Chavez |                       |                  | GCM Medical Group PSC                            | San Juan, Puerto Rico, United States     |                                                         |                                                                                            |
| Scott                             | Gottlieb        |                       |                  | Dermatology and Skin Surgery Center              | Exton, Pennsylvania, United States       |                                                         |                                                                                            |
| Holly                             | Hake Harris     |                       |                  | The South Bend Clinic                            | South Bend, Indiana, United States       |                                                         |                                                                                            |
| Jessica                           | Kaffenberger    |                       |                  | Ohio State University College Of Medicine        | Gahanna, Ohio, United States             |                                                         |                                                                                            |
| Pearl                             | Kwong           |                       |                  | Solutions Through Advanced Research, Inc.        | Jacksonville, Florida, United States     |                                                         |                                                                                            |
| Sabre                             | Leitenberger    |                       |                  | Oregon Health and Science University             | Portland, Oregon, United States          |                                                         |                                                                                            |

## Supplemental Online Content: Nonauthor Collaborators

\*Indicates required information. Only first name, last name, and suffix will appear in PubMed.

| *First Name and Middle Initial(s) | *Last Name      | *Suffix (eg, Jr, III) | Academic Degrees | Institution                                                     | Location (city, state/province, country)   | Role or Contribution, eg, chair, principal investigator | Group (if more than 1 Group listed in the byline) and/or Subgroup (eg, Steering Committee) |
|-----------------------------------|-----------------|-----------------------|------------------|-----------------------------------------------------------------|--------------------------------------------|---------------------------------------------------------|--------------------------------------------------------------------------------------------|
| Aida                              | Lugo-Somolinos  |                       |                  | University of North Carolina Dermatology and Skin Cancer Center | Chapel Hill, North Carolina, United States |                                                         |                                                                                            |
| Anna                              | Kirkorian       |                       |                  | Children's National Medical Center                              | Washington DC, United States               |                                                         |                                                                                            |
| Kari                              | Martin          |                       |                  | University of Missouri                                          | Columbia, Missouri, United States          |                                                         |                                                                                            |
| Amy                               | Paller          |                       |                  | Northwestern University                                         | Chicago, Illinois, United States           |                                                         |                                                                                            |
| David                             | Pariser         |                       |                  | Virginia Clinical Research                                      | Norfolk, Virginia, United States           |                                                         |                                                                                            |
| Phoebe                            | Rich            |                       |                  | Oregon Dermatology and Research Center                          | Portland, Oregon, United States            |                                                         |                                                                                            |
| Adena                             | Rosenblatt      |                       |                  | University of Chicago Medical Center                            | Chicago, Illinois, United States           |                                                         |                                                                                            |
| Lucia                             | Seminario-Vidal |                       |                  | University of South Florida                                     | Tampa, Florida, United States              |                                                         |                                                                                            |
| Elaine                            | Siegfried       |                       |                  | SSM Health Cardinal Glennon Children's Hospital                 | St. Louis, Missouri, United States         |                                                         |                                                                                            |
| Jeffrey                           | Travers         |                       |                  | Wright State Physicians Dermatology                             | Fairborn, Ohio, United States              |                                                         |                                                                                            |
| Pedro                             | Vendrell-Benito |                       |                  | Ponce School of Medicine CAIMED Center                          | Ponce, Puerto Rico, United States          |                                                         |                                                                                            |
| Jamie                             | Weisman         |                       |                  | Advanced Medical Research                                       | Sandy Springs, Georgia, United States      |                                                         |                                                                                            |
| Lara                              | Wine Lee        |                       |                  | Medical University of South Carolina                            | Charleston, South Carolina, United States  |                                                         |                                                                                            |
| Matthew                           | Zook            |                       |                  | Olympian Clinical Research                                      | Clearwater, Florida, United States         |                                                         |                                                                                            |
| Samuel                            | Sanches-Rivera  |                       |                  | Office of Dr. Samuel Sanchez PSC                                | Caguas, Puerto Rico, United States         |                                                         |                                                                                            |

Supplemental Online Content: Nonauthor Collaborators

\*Indicates required information. Only first name, last name, and suffix will appear in PubMed.

| <b>*First Name and Middle Initial(s)</b> | <b>*Last Name</b> | <b>*Suffix (eg, Jr, III)</b> | Academic Degrees | Institution                                      | Location (city, state/province, country)   | Role or Contribution, eg, chair, principal investigator | Group (if more than 1 Group listed in the byline) and/or Subgroup (eg, Steering Committee) |
|------------------------------------------|-------------------|------------------------------|------------------|--------------------------------------------------|--------------------------------------------|---------------------------------------------------------|--------------------------------------------------------------------------------------------|
| Vivian                                   | Laquer            |                              |                  | Tien Q. Nguyen, MD Inc. DBA First OC Dermatology | Fountain Valley, California, United States |                                                         |                                                                                            |
